# Supplementary material
Source: HighWire-hosted journal article supplement (https://www.cmajopen.ca/highwire/filestream/90421/field_highwire_adjunct_files/1/open-2023-0006-original-submission.pdf)
Supplement: open-2023-0006-original-submission.pdf [file open-2023-0006-original-submission.pdf]

## Title Page

# Métis health in Canada: A scoping review of Métis-specific health literature

Krysta Gmitroski BSc<sup>1</sup>, Gabrielle Legault PhD<sup>2</sup>, Skye Barbic PhD, OT<sup>1,3-6</sup>

<sup>1</sup> Faculty of Medicine, University of British Columbia, 317-2194 Health Sciences Mall, Vancouver, BC, Canada, V6T 1Z3

<sup>2</sup> Department of Community, Culture, and Global Studies, University of British Columbia Okanagan, 3187 University Way, ASC 413, Kelowna, BC Canada V1V 1V7

<sup>3</sup> Department of Occupational Science and Occupational Therapy, University of British Columbia, 317-2194 Health Sciences Mall, Vancouver, BC, Canada, V6T 1Z3

<sup>4</sup> Providence Research, 10<sup>th</sup> Floor – 1190 Hornby Street, Vancouver, BC, Canada, V6Z 2K5

<sup>5</sup> Centre for Health Evaluation & Outcome Sciences, 588-1081 Burrard Street, Vancouver, BC, Canada, V6Z 1Y6

<sup>6</sup> Foundry, 915-1045 Howe Street, Vancouver, BC, Canada, V6Z 2A9

### Address correspondence to:

**Krysta-Leigh Gmitroski**, BSc

UBC Medical Student

Department of Medicine | Faculty of Medicine

Island Medical Program | *Songhees, Esquimalt and WSÁNEĆ Lands*

University of Victoria, 3800 Finnerty Road, Medical Sciences Bldg Victoria, BC | V8P 5C2

The University of British Columbia | Vancouver Campus

317 - 2194 Health Sciences Mall | [Musqueam Territory](#)/ Vancouver British Columbia | V6T 2A1

Cell: 250-508-1486

email: [klgmi@student.ubc.ca](mailto:klgmi@student.ubc.ca) |

Pronouns: *She, her, hers*

## Abstract

**Background:** To understand what is known about health needs of Métis People and identify trends and gaps that may exist.

**Methods:** Using Arskey and O'Malley's five stage scoping review methods, we searched PubMed®, MEDLINE, iPortal Indigenous Studies Portal Research Tool, and pertinent reference lists using the terms "Métis", "health", and "Canada". We conducted searches in May 2022 and included studies available in English, published from 2012-2022, that focused on *only* Métis populations in Canada. We categorized studies based on relevant study metrics.

**Results:** Of the 572 studies available from searches, 26 studies were included. Fifty-eight percent were quantitative, 31% qualitative, and 12% mixed methods. Forty-two percent of studies used community-based participatory action research (CBPAR) methods; 54% extracted data from national surveys. Most (77%) studies only included adults; 4% specifically investigated children. Geographic focus was 35% pan-Canada, 19% Ontario, and 15% for each of Alberta, British Columbia, and Manitoba. Topics included health, well-being, and spirituality (19%); mental health (19%); physical diagnoses (19%); pandemic-related interventions (12%); access to urgent/emergency care health services (8%); support networks (8%); experience in health care (8%); and lifestyle risk factors (8%).

**Interpretation:** Métis-specific health services research is lacking in Canada. Mental health, well-being, and spirituality are important themes to explore in Métis communities. There is a lack of child and adolescence representation in the included studies, as well as 2SLGBTQIA+ Métis community members. This review illustrates the need for more studies with strong community engagement and CBPAR strategies to further explore Métis health and health services needs.

## Introduction

The Métis are one of three federally recognized Indigenous Peoples in Canada, descendants of First Nation women and fur traders in the late 18<sup>th</sup> century (1). Métis People make up over one-third of the 1.7 million Indigenous Peoples in Canada and almost 2% of Canada's entire population (2). Métis People are a distinct Indigenous group, with their own culture, traditions, language, nationhood, and way of life (1).

Though endlessly resilient, Métis People have faced ongoing impacts of colonialism in Canada, including forced removal of children to residential and mission schools, overrepresentation of Métis children in the child welfare system, and land displacement strategies that have attempted to disconnect the Métis from their lands (3,4). There are also historical and continued racist policies implemented by the Canadian government that discriminate against Métis People, such as the Scrip system and exclusion from treaties (5). Métis People continually face policy and jurisdictional gaps in Canada as well, with many funded programs for Indigenous Peoples specifically targeting First Nations groups and excluding Métis (4,6). Métis are also facing federal exclusion from Non-Insured Health Benefits (NIHB), a federal government program that provides registered First Nations and Inuit Peoples with certain health benefits such as prescription drugs, mental health counselling, medical equipment, and dental care (7,8). As such, literature suggests that Métis People, like other Indigenous groups, experience poorer health outcomes, while also occupying a unique space of feeling caught between mainstream and First Nations-specific services (9).

Most of the literature and research available on Indigenous health matters include First Nations, Inuit, and Métis metrics combined (10). As each group is culturally distinct, there is a need to assess each group individually. For Métis People in particular, previous work has suggested that they can feel excluded and discriminated against in both mainstream and Indigenous-specific health services. It is therefore imperative to scan the existing literature to better understand the needs of Métis communities and improve their experiences accessing health care services (9,11).

The purpose of this scoping review is to identify the breath of literature available on Métis health research from the past decade. The secondary purposes are to understand what is known about Métis-specific health needs and service access in Canada, and to identify gaps and trends that may exist.

## Methods

### Study design

Our methodology was based off of the methods and principles laid out by Arksey and O'Malley (12) and refined by Levac et al. (13), as well as the PRISMA Extension for Scoping Reviews (14). We followed their five steps: identifying the research question; identifying relevant studies; selecting of studies; charting of data; collating and reporting data.

## Identifying the research question

Our primary question was, “What is known about the general health and breadth of health care services and experiences among Métis People living in Canada.”

## Identifying relevant studies

With the help of the University of British Columbia’s Island Medical Program Librarian, Dr. Christine J. Fontaine, we selected relevant databases and search terms. We searched PubMed®, iPortal Indigenous Studies Portal Research Tool, MEDLINE, and relevant reference lists with the search terms “Métis”, “health”, and “Canada”. Co-author and Métis scholar, Dr. Gabrielle Legault, identified additional sources to search based on expertise in the area. Searches were conducted in May 2022.

## Study selection

We included studies available in English and published in the last decade, 2012-2022, primarily focused on *only* Métis populations in Canada. Scoping reviews, editorials and commentaries, guidelines and policies, and studies focused on other or more broadly defined Indigenous communities in Canada were excluded.

## Charting the data and data analysis

Articles were coded in Microsoft Excel according to study type, aims, method, location, findings, and implications, as described by Levac et al. (12). Topics of research were coded based on a set of inductive codes developed throughout the review process. We analyzed the results of the studies for common themes and produced summative data on the included studies in Excel tables.

## Ethics approval

We did not require ethics approval as all data were available in published records.

## Results

The search yielded 572 entries: 95 from PubMed®, 233 from iPortal, 244 from MEDLINE, and 0 from Gale Primary Resources. After applying the inclusion and exclusion criteria described above, and removing duplicates, we identified 26 unique articles. Table 1 illustrates the characteristics for each selected study including year of publication, type of study, location, health topic code, age of studied population, main findings, and if the study methodologically included community-based participatory action research (CBPAR) or extraction of national level survey data.

1  
2  
3 [insert table 1 here]  
4

5 Collation and summary of included studies (n=26) revealed interesting trends in Métis-related  
6 research. Of the 26 included studies' methodology, 58% were quantitative, 31% qualitative, and  
7 12% mixed methods. Quantitative studies covered vast topics, but tended to lean towards  
8 lifestyle risk factors and specific diagnoses. The qualitative studies largely centered on mental  
9 health, well-being, and spirituality; and Métis experience in health care services. The mixed  
10 methods studies focused on pandemic-related interventions and health, well-being, and  
11 spirituality.  
12  
13

14 Only 42% of studies incorporated appropriate and respectful CBPAR and Indigenous-centered  
15 methodology, which is an important piece of any research involving Indigenous communities in  
16 Canada as outlined by Atzema et al. (15); First Nations principles of Ownership, Control,  
17 Access, and Possession (OCAP®); and the Canadian Institute of Health Research (CIHR)  
18 guidelines (16,17). Qualitative and mixed methods studies all had strong engagement with Métis  
19 communities as a piece of their methodology, whereas only one quantitative study included  
20 engagement with community members. Furthermore, 54% of the studies were based on  
21 extraction of data from national level surveys, such as the 2006 Aboriginal Peoples Survey  
22 (APS) or Canadian Census data, and did not involve any community engagement in the  
23 extraction, utilization, and interpretation of the data.  
24  
25  
26

27 Representative geographical regions for each study were also mapped. Thirty-five percent of the  
28 studies reflected Canada-wide data and did not break down results according to geographic  
29 region. An additional 19% (5 studies) represented Ontario-specific Métis populations, two of  
30 which were focused on the Toronto area specifically. Finally, 15% (4 studies) were focused on  
31 each of the provinces of Alberta, British Columbia, and Manitoba. There were no dedicated  
32 studies for any other province or territory.  
33  
34

35 While all studies selected focused on Métis populations in Canada, only 4% (1 study)  
36 specifically investigated children and youth, based on how parents or caregivers filled out the  
37 2006 APS with respect to their child or youth in their home. The vast majority (77%) of the  
38 selected articles involved only adults, and the remaining 19% did not specify ages of participants  
39 in their methodology.  
40  
41

42 The selected studies were inductively coded into eight categories based on the topic matter  
43 researched: health, well-being, and spirituality; access to urgent/emergency health services;  
44 support networks; experience with health care; mental health; physical diagnoses; pandemic-  
45 related interventions; and lifestyle risk factors (Table 2).  
46  
47

48 [insert table 2 here]  
49  
50

51 The main findings and implications of the included studies are summarized in Table 1. Several  
52 studies focused on health related outcomes, such as prevalence of diseases such as cancer or  
53 incidence of smoking, found that health outcomes for Métis populations in the regions identified  
54 tend to be worse than the non-Indigenous counter-parts. In qualitative studies where Métis  
55  
56  
57  
58  
59  
60

1  
2  
3 perspectives and experiences were sought, the consistent themes that emerged included feelings  
4 of Métis People facing discrimination in both Indigenous and non-Indigenous service streams  
5 and a strong need for more Métis-specific services and Métis culturally sensitive services.  
6 Several studies linked strengths in the health and well-being of Métis People to their support  
7 network, cultural connectedness, and spirituality.  
8  
9

## 10 Interpretation

11  
12 Over half of the identified studies used data from national surveys, most prominently the 2006  
13 APS, as a source of data. While there is merit to this approach, namely in the volume and  
14 accessibility of data, it is notable that these same studies did not participate in any CBPAR, and  
15 thus lacked the perspective of the very communities they studied to help contextualize and give  
16 insight on the findings or point out any difficulties or challenges that the APS poses. There are  
17 also ethical considerations in using these types of data without community input regarding  
18 ownership and control of the data, as outlined in the First Nations principles of OCAP®  
19 guidelines, the CIHR guidelines, and the Métis centre at National Aboriginal History  
20 Organisation (16–18) Furthermore, there are challenges with Métis data from APSs being used  
21 for studies, as they are the product of self-identified Métis survey respondents. This means that  
22 the data stem from a combination of Métis People as we have described thus far, a culturally,  
23 historically, and geographically distinct group, and people who interpret Métis to broadly mean  
24 “of mixed Indigenous and European ancestry”, which skews the data collected and the  
25 implications of studies using these data (Andersen, 2014).  
26  
27  
28  
29

30 The studies that engaged in meaningful CBPAR with Métis community members, incorporated  
31 Métis values, had Métis investigators, and followed Indigenous-based methodology resulted in  
32 rich data that uncovered the nuanced experiences of being Métis. For example, these practices  
33 uncovered the themes of Métis women experiencing discrimination both in mainstream and  
34 Indigenous-based services, and a follow-up study cultivated actionable recommendations to  
35 improve health and social services from a Métis perspective (11,19). CBPAR is an important  
36 methodology because the collaborative approach ensures research is more relevant to the  
37 community being engaged (20).  
38  
39

40 According to 2016 Census data, Métis people reside in all provinces and territories, with the  
41 majority of them living in the provinces of Ontario, Alberta, Manitoba, and British Columbia (2).  
42 The geographic breakdown of the identified studies reflects this, but notably lacks representation  
43 in other areas where many Métis peoples reside, such as Saskatchewan.  
44  
45

46 It is interesting to note that the two studies that centered around cancer incidence did not find the  
47 same results. Sanchez-Ramirez et al. (34) found that Métis men in Alberta experience a higher  
48 incidence of lung and bronchus cancer than their non-Métis counterparts, while no other  
49 statistically significant differences in cancer incidence and mortality were found. Conversely,  
50 Mazereeuw et al. (29) found that cancer incidence was higher in Métis people in female breast  
51 cancer, lung, liver, larynx, gallbladder, and cervical cancers. These studies did investigate  
52 different geographic regions, one pan-Canadian and one Alberta specific, suggesting that  
53 different geographic subsets of Métis People may experience different incidences of cancers.  
54 This suggests that more comprehensive cancer incidence studies for Métis People across various  
55  
56  
57  
58  
59  
60

1  
2  
3 geographic regions could be important to further understand the differences in cancer incidence  
4 in Métis People.  
5

6  
7 There is a significant gap in the recent literature around Métis youth. Only one identified study  
8 investigated children and adolescence, based on the 2006 APS responses filled out by their  
9 caregivers (22). No studies have sought the perspectives and experiences of Métis youth, despite  
10 Métis ages 15-24 making up 16% of the Métis population in Canada (23). Métis youth are sure to  
11 have unique perspectives and experiences with respect to their health and well-being, as they  
12 navigate their identities among a new generation of Indigenous Peoples. Furthermore, while  
13 many of the studies performed gender analysis with respect to women and men, none of the  
14 included studies explored 2SLGBTQIA+ individuals, leaving a glaring gap in the literature. With  
15 only 26 studies in the last decade dedicated purely to research with Métis communities, there is  
16 no shortage of gaps in the literature. Two categories (mental health; health, well-being, and  
17 spirituality) made up nearly half of the topics of research, particularly in CBPAR studies, which  
18 indicates that these things have been a research priority for Métis communities over the last  
19 decade. With only 10 studies total existing in these categories, there is certainly still room for  
20 more focus in this area, particularly in specific sub-populations of Métis People. Additionally, it  
21 is worth noting that many of the rich qualitative studies that focused on Métis experiences had  
22 limited numbers of participants, so there is value in repeating similar studies with more  
23 participants, or even including larger or different geographic regions.  
24  
25  
26  
27  
28

## 29 Limitations

30  
31  
32 There are a few limitations of this methodology based on resources. Only one researcher applied  
33 inclusion and exclusion criteria and performed coding of selected articles, when ideally two  
34 would be used. Due to resource and time constraints, the date range of selected articles was  
35 limited to the past decade, when additional studies were available outside of that range. Finally,  
36 no critical appraisal tools were used to appraise the literature selected, which could have  
37 provided additional context for this review.  
38  
39  
40

## 41 Conclusion

42  
43  
44 Only 26 studies in the last decade were identified that fit the inclusion criteria of this review.  
45 This suggests that there is a lack of Métis-specific research in Canada. Notably, over half of  
46 these studies were data extractions from large surveys and lacked any element of community  
47 engagement in their methodology, thus missing important perspectives and context. Over half of  
48 the studies were quantitative in their methodology. The themes of mental health and health, well-  
49 being, and spirituality have been important themes explored in Métis communities over the last  
50 decade, thus suggesting that this is a priority for research. There was a notable lack of children,  
51 youth, and adolescence representation in the included studies, illustrating the need for more work  
52 to explore the needs and perspectives of Métis young people, as well as 2SLGBTQIA+ Métis  
53 community members. This review illustrates the need for more studies with strong community  
54 engagement and CBPAR strategies to further explore Métis health in Canada.  
55  
56  
57  
58  
59  
60

## Footnotes

- **Competing interests:** None declared.
- **Contributors:** KG is a Métis medical student who conceived and designed the study. All authors contributed to data acquisition, analysis, and interpretation. KG drafted the first draft of the manuscript, which all authors critically revised. All authors gave final approval of the version to be published and agreed to be accountable for all aspects of the work.
- **Funding:** This study was not funded.
- **Data sharing:** All data are available for sharing upon request.
- **Supplemental information:** N/A

Confidential



## References

1. About | Métis National Council [Internet]. archive.ph. 2021 [cited 2022 May 17]. Available from: <https://archive.ph/2l5jk>
2. Government of Canada SC. Aboriginal Peoples Highlight Tables, 2016 Census [Internet]. 2017 [cited 2022 May 12]. Available from: <https://www12.statcan.gc.ca/census-recensement/2016/dp-pd/hlt-fst/abo-aut/Table.cfm?Lang=Eng&T=101&S=99&O=A>
3. Auger MD. ‘We need to not be footnotes anymore’: understanding Métis people’s experiences with mental health and wellness in British Columbia, Canada. *Public Health*. 2019 Nov;176:92–7.
4. Logan T. Settler colonialism in Canada and the Métis. *J Genocide Res*. 2015 Oct 2;17(4):433–52.
5. Fiola C. Rekindling the sacred fire Métis ancestry and Anishinaabe spirituality [Internet]. 2015 [cited 2022 May 17]. Available from: <https://search.ebscohost.com/login.aspx?direct=true&scope=site&db=nlebk&AN=1234268>
6. Waldram JB, Herring A, Young TK. *Aboriginal Health in Canada: Historical, Cultural, and Epidemiological Perspectives*. University of Toronto Press; 2006. 385 p.
7. Non-Insured Health Benefits program: First Nations and Inuit Health Branch: Annual report 2018 to 2019 [Internet]. [cited 2022 Jun 3]. Available from: <https://www.sac-isc.gc.ca/eng/1584392581890/1584393350542>
8. Allan B, Smylie J. *First Peoples, second class treatment: The role of racism in the health and well-being of Indigenous peoples in Canada*. [Internet]. Toronto, ON: Wellesley Institute.; 2015. Available from: <https://www.wellesleyinstitute.com/wp-content/uploads/2015/02/Summary-First-Peoples-Second-Class-Treatment-Final.pdf>
9. Smylie J, Martin CM, Kaplan-Myrth N, Steele L, Tait C, Hogg W. Knowledge translation and indigenous knowledge. *Int J Circumpolar Health*. 2004 Sep;63(sup2):139–43.
10. Brock T, Chowdhury MA, Carr T, Panahi A, Friesen M, Groot G. Métis Peoples and Cancer: A Scoping Review of Literature, Programs, Policies and Educational Material in Canada. *Curr Oncol*. 2021 Dec 4;28(6):5101–23.
11. Monchalin R, Smylie J, Nowgesic E. “I Guess I Shouldn’t Come Back Here”: Racism and Discrimination as a Barrier to Accessing Health and Social Services for Urban Métis Women in Toronto, Canada. *J Racial Ethn Health Disparities*. 2020 Apr;7(2):251–61.
12. Arksey H, O’Malley L. Scoping studies: towards a methodological framework. *Int J Soc Res Methodol*. 2005 Feb;8(1):19–32.

13. Levac D, Colquhoun H, O'Brien KK. Scoping studies: advancing the methodology. *Implement Sci.* 2010 Sep 20;5(1):69.
14. Tricco AC, Lillie E, Zarin W, O'Brien KK, Colquhoun H, Levac D, et al. PRISMA Extension for Scoping Reviews (PRISMA-ScR): Checklist and Explanation. *Ann Intern Med.* 2018 Oct 2;169(7):467–73.
15. Anderson S, Copeland JL, Currie CL. Community Belonging and Sedentary Behaviour Among Métis Canadians: A Gendered Analysis. *Int J Indig Health.* 2017 Sep 20;12(2):3–14.
16. Atzema CL, Khan S, Lu H, Allard YE, Russell SJ, Gravelle MR, et al. Cardiovascular Disease Rates, Outcomes, and Quality of Care in Ontario Métis: A Population-Based Cohort Study. Zhang W, editor. *PLOS ONE.* 2015 Mar 20;10(3):e0121779.
17. Auger M. "The Strengths of Our Community and Our Culture": Cultural Continuity as a Determinant of Mental Health for Métis People in British Columbia. *Turt Isl J Indig Health [Internet].* 2021 Nov 3 [cited 2022 May 6];1(2). Available from: <https://jps.library.utoronto.ca/index.php/tijih/article/view/36046>
18. Carrière GM, Kumar MB, Sanmartin C. Hospitalization for ambulatory care sensitive conditions among urban Métis adults. *Health Rep.* 2017 Dec 20;28(12):3–11.
19. Cooke MJ, Wilk P, Paul KW, Gonneville SLH. Predictors of Obesity Among Métis Children: Socio-economic, Behavioural and Cultural Factors. *Can J Public Health.* 2013 Jul;104(4):e298–303.
20. Cooper EJ, Sanguins J, Menec V, Chartrand AF, Carter S, Driedger SM. Culturally Responsive Supports for Metis Elders and Metis Family Caregivers. *Can J Aging Rev Can Vieil.* 2020 Jun;39(2):206–19.
21. Driedger SM, Maier R, Sanguins J, Carter S, Bartlett J. Pandemic H1N1 Targeted Messaging for Manitoba Metis: An Evaluation of a Risk Communication Intervention. *Aborig Policy Stud [Internet].* 2014 Mar 30 [cited 2022 May 2];3(1–2). Available from: <https://journals.library.ualberta.ca/aps/index.php/aps/article/view/20022>
22. Driedger SM, Maier R, Furgal C, Jardine C. Factors influencing H1N1 vaccine behavior among Manitoba Metis in Canada: a qualitative study. *BMC Public Health.* 2015 Dec;15(1):128.
23. Gershon AS, Khan S, Klein-Geltink J, Wilton D, To T, Crighton EJ, et al. Asthma and Chronic Obstructive Pulmonary Disease (COPD) Prevalence and Health Services Use in Ontario Métis: A Population-Based Cohort Study. Nolan A, editor. *PLoS ONE.* 2014 Apr 23;9(4):e95899.
24. Ginn CS, Ginn CWC, Gervais L, Gentes J, Bergum DDV, Rees N, et al. Exploring Métis health, spirituality and well-being: a patient-oriented community-based qualitative study with the Métis Nation of Alberta – Region 3. *CMAJ Open.* 2021 Apr;9(2):E451–8.

- 1  
2  
3 25. Hayward JS, McArthur E, Nash DM, Sontrop JM, Russell SJ, Khan S, et al. Kidney Disease  
4 Among Registered Métis Citizens of Ontario: A Population-Based Cohort Study. *Can J Kidney*  
5 *Health Dis.* 2017 Jan;4:205435811770307.  
6
- 7  
8 26. Hutchinson P, Dingwall C, Kurtz D, Evans M, Jones G, Corbett J. Maintaining the Integrity of  
9 Indigenous Knowledge; Sharing Metis Knowing Through Mixed Methods. *Int J Crit Indig Stud.*  
10 2014 Jan 1;7(1):1–14.  
11
- 12 27. Kaspar V. Long-term depression and suicidal ideation outcomes subsequent to emancipation  
13 from foster care: Pathways to psychiatric risk in the Métis population. *Psychiatry Res.* 2014  
14 Feb;215(2):347–54.  
15
- 16  
17 28. King KD, Bartel R, James A, MacDonald SE. Practice report: an Alberta Métis model for  
18 COVID-19 vaccine delivery. *Can J Public Health.* 2022 Feb;113(1):81–6.  
19
- 20 29. Kumar MB, Walls M, Janz T, Hutchinson P, Turner T, Graham C. Suicidal ideation among  
21 Métis adult men and women – associated risk and protective factors: findings from a nationally  
22 representative survey. *Int J Circumpolar Health.* 2012 Jan 31;71(1):18829.  
23  
24
- 25 30. Mazereeuw MV, Withrow DR, Nishri ED, Tjepkema M, Vides E, Marrett LD. Cancer incidence  
26 and survival among Métis adults in Canada: results from the Canadian census follow-up cohort  
27 (1992–2009). *Can Med Assoc J.* 2018 Mar 19;190(11):E320–6.  
28
- 29 31. Monchalin R, Smylie J, Bourgeois C, Firestone M. “I would prefer to have my health care  
30 provided over a cup of tea any day”: recommendations by urban Métis women to improve access  
31 to health and social services in Toronto for the Métis community. *Altern Int J Indig Peoples.*  
32 2019 Sep;15(3):217–25.  
33  
34
- 35 32. Ramage-Morin PL, Bougie E. Family networks and health among Métis aged 45 or older. *Health*  
36 *Rep.* 2017 Dec 20;28(12):12–20.  
37  
38
- 39 33. Ryan CJ, Cooke MJ, Leatherdale ST, Kirkpatrick SI, Wilk P. The correlates of current smoking  
40 among adult Métis: Evidence from the Aboriginal Peoples Survey and Métis Supplement. *Can J*  
41 *Public Health.* 2015 Jul;106(5):e271–6.  
42
- 43 34. Ryan CJ, Cooke M, Kirkpatrick SI, Leatherdale ST, Wilk P. The correlates of physical activity  
44 among adult Métis. *Ethn Health.* 2018 Aug 18;23(6):629–48.  
45  
46
- 47 35. Sanchez-Ramirez DC, Colquhoun A, Parker S, Randall J, Svenson LW, Voaklander D. Cancer  
48 incidence and mortality among the Métis population of Alberta, Canada. *Int J Circumpolar*  
49 *Health.* 2016 Jan 31;75(1):30059.  
50
- 51 36. Sanchez-Ramirez DC, Chen Y, Randall JR, Sporidis MJ, Svenson L, Voaklander B, et al. Injury-  
52 related health services use and mortality among Métis people in Alberta. *Can J Public Health.*  
53 2019 Aug;110(4):422–9.  
54  
55  
56  
57  
58  
59  
60

- 1  
2  
3 37. Sanguins, J., Bartlett, J., Carter, S., Hoepfner, N., Mehta, P., & Bassily, M. (2013). Depression,  
4 anxiety disorders, and related health care utilization in the Manitoba Metis population.  
5 Winnipeg, MB: Manitoba Metis Federation.  
6  
7  
8 38. Wesche SD. Métis Women at Risk: Health and Service Provision in Urban British Columbia.  
9 :10.  
10  
11 39. Government of Canada Canadian Institute of Health Research. CIHR Guidelines for Health  
12 Research Involving Indigenous People (2007-2010) - CIHR [Internet]. 2005 [cited 2022 May  
13 10]. Available from: <https://cihr-irsc.gc.ca/e/29134.html>  
14  
15  
16 40. The First Nations Principles of OCAP® [Internet]. The First Nations Information Governance  
17 Centre. [cited 2022 Jun 3]. Available from: <https://fnigc.ca/ocap-training/>  
18  
19 41. National Aboriginal Health Organization (NAHO) Publications and Resources [Internet]. [cited  
20 2022 Jun 21]. Available from: [https://fnim.sehc.com/se-learning/naho-publications-and-](https://fnim.sehc.com/se-learning/naho-publications-and-resources/metis-centre)  
21 [resources/metis-centre](https://fnim.sehc.com/se-learning/naho-publications-and-resources/metis-centre)  
22  
23  
24 42. Culhane-Pera KA, Allen M, Pergament SL, Call K, Adawe A, de la Torre R, et al. Improving  
25 Health through Community-Based Participatory Action Research. *Minn Med*. 2010  
26 Apr;93(4):54–7.  
27  
28 43. Government of Canada SC. Chapter 4: Indigenous Youth in Canada [Internet]. 2021 [cited 2022  
29 May 12]. Available from: [https://www150.statcan.gc.ca/n1/pub/42-28-](https://www150.statcan.gc.ca/n1/pub/42-28-0001/2021001/article/00004-eng.htm)  
30 [0001/2021001/article/00004-eng.htm](https://www150.statcan.gc.ca/n1/pub/42-28-0001/2021001/article/00004-eng.htm)  
31  
32  
33  
34  
35  
36  
37  
38  
39  
40  
41  
42  
43  
44  
45  
46  
47  
48  
49  
50  
51  
52  
53  
54  
55  
56  
57  
58  
59  
60

Table 1. Selected studies pertaining to Métis health in Canada, as determined by search of PubMed®, iPortal Indigenous studies research tool, MEDLINE, Gale Primary Resources, and relevant reference lists with search terms “Métis”, “health” and “Canada”. Studies available in English and published in the last decade, 2012-2022, primarily focused on *only* Métis populations in Canada were included, while scoping reviews, editorials and commentaries, guidelines and policies, and studies focused on other or more broadly defined Indigenous communities in Canada were excluded. Acronyms of medical abbreviations are listed below the table. Please note, the word ‘Aboriginal’ is only used in the context that the individual studies used it themselves. We note our preference for the language to be Indigenous.

| Author and year            | Type         | Location         | Code                                       | Study aim                                                                                                        | Age                      | Main findings                                                                                                                                                                                           | CBPAR | National Survey Data                               |
|----------------------------|--------------|------------------|--------------------------------------------|------------------------------------------------------------------------------------------------------------------|--------------------------|---------------------------------------------------------------------------------------------------------------------------------------------------------------------------------------------------------|-------|----------------------------------------------------|
| Anderson et al., 2017 (15) | Quantitative | Canada           | Health, well-being, and spirituality       | To examine gender and sense of community belonging influences on sedentary behaviour                             | Adults, ages unspecified | Community belonging among Métis men may reduce sedentary behaviour, but increased community belonging among Métis women may increase sedentary behaviour.                                               | No    | Canadian Community Health Survey                   |
| Atzema et al., 2015 (16)   | Quantitative | Ontario          | Physical diagnoses                         | To determine rates of cardiovascular diseases in Métis population                                                | Ages unspecified         | Cardiovascular disease was higher in the Métis compared to the general population: prevalence of five cardiovascular conditions was 25% to 77% higher.                                                  | No    | No - other Ontario registries used                 |
| Auger, 2019 (3)            | Qualitative  | British Columbia | Mental health                              | To contribute to an increased understanding of Métis People's experiences in mental health and wellness          | Ages 18-84 (mean 46)     | Mental health is a priority for Métis people in British Columbia, and there is a need for increased access to culturally responsive health care.                                                        | Yes   | No                                                 |
| Auger, 2021 (17)           | Qualitative  | British Columbia | Mental health                              | To explore Métis People's experiences and conceptualizations of mental health and cultural continuity            | Ages 19+                 | Themes identified: Métis stories of culture, identity, and mental health; the importance of community; and intergenerational knowledge transmission.                                                    | Yes   | No                                                 |
| Carrière et al., 2017 (18) | Quantitative | Canada           | Access to urgent/emergency health services | To describe ACSC hospitalizations among urban Métis adults relative to their non-Aboriginal counterparts         | Ages 18-74               | The ASHR for ACSCs among urban Métis adults was twice that among non-Aboriginal adults. These hospitalizations were for diabetes or COPD.                                                               | No    | 2006/2007 to 2008/2009 Discharge Abstract Database |
| Cooke et al., 2013 (19)    | Quantitative | Canada           | Lifestyle risk factors                     | To examine the socio-economic, behavioural, and Métis-specific factors that predict obesity among Métis children | Ages 6-14                | An estimated 18.5% of Métis boys and 14.4% of girls were obese. Risk factors included living in a lone-parent family and rural, PMK residential schooling. The effects were negative among older girls. | No    | 2006 APS                                           |
| Cooper et al., 2020 (20)   | Qualitative  | Manitoba         | Support                                    | To identify current supports, needs, and expectations of                                                         | Adults, ages             | Need to have tools in place to help people age and to care for aging                                                                                                                                    | Yes   | No                                                 |

1  
2  
3  
4  
5  
6  
7  
8  
9  
10  
11  
12  
13  
14  
15  
16  
17  
18  
19  
20  
21  
22  
23  
24  
25  
26  
27  
28  
29  
30  
31  
32  
33  
34  
35  
36  
37  
38  
39  
40  
41  
42  
43  
44  
45  
46  
47

|                              |               |                  |                                      |                                                                                                                                                                                                                                                                     |                               |                                                                                                                                                                                                                                                                                      |     |                                                  |
|------------------------------|---------------|------------------|--------------------------------------|---------------------------------------------------------------------------------------------------------------------------------------------------------------------------------------------------------------------------------------------------------------------|-------------------------------|--------------------------------------------------------------------------------------------------------------------------------------------------------------------------------------------------------------------------------------------------------------------------------------|-----|--------------------------------------------------|
|                              |               |                  | networks                             | unpaid Métis caregivers caring for Métis seniors                                                                                                                                                                                                                    | unspecified                   | family members in a culturally responsive manner.                                                                                                                                                                                                                                    |     |                                                  |
| Driedger et al., 2014 (21)   | Mixed Methods | Manitoba         | Pandemic-related intervention        | To evaluate the 2009/10 H1N1 influenza pandemic door-to-door risk communication campaign that targeted at-risk Métis                                                                                                                                                | Ages 18-65                    | This intervention ultimately did not meet its intended goals. Efforts can be made during inter-pandemic periods to build on established relationships, learn from past experiences, and develop new solutions.                                                                       | Yes | No                                               |
| Driedger et al., 2015 (22)   | Qualitative   | Manitoba         | Pandemic-related intervention        | To connect vaccine behavior with the attitudes and beliefs that influenced Métis study participants' H1N1 influenza vaccine decision-making                                                                                                                         | Adults, ages unspecified      | The negatively influential factors were lack of knowledge about the vaccine and the pandemic, as well as concerns about vaccine safety. Risk of contracting H1N1 was the biggest positively influencing factor.                                                                      | Yes | No                                               |
| Gershon et al., 2014 (23)    | Quantitative  | Ontario          | Physical diagnoses                   | To measure and compare burden of asthma and COPD between Métis and non-Métis populations                                                                                                                                                                            | Adults (asthma 20+, COPD 35+) | Prevalence of asthma and COPD were 30% and 70% higher, respectively, in the Métis. Lower rates of physician visits suggest barriers in access to primary care services.                                                                                                              | No  | No - other Ontario registries used               |
| Ginn et al., 2021 (24)       | Qualitative   | Alberta          | Health, well-being, and spirituality | To explore links among health, spirituality, and well-being within Métis                                                                                                                                                                                            | Ages 28-80                    | Connection among ancestry, land, community, and tradition contributed to well-being.                                                                                                                                                                                                 | Yes | No                                               |
| Hayward et al., 2017 (25)    | Quantitative  | Ontario          | Physical diagnoses                   | To compare the prevalence of chronic kidney disease and incidence of acute kidney injury and end-stage kidney disease among registered Métis citizens to general population                                                                                         | Ages 18+                      | Prevalence of chronic kidney disease was slightly higher among Métis citizens compared with the general population.                                                                                                                                                                  | No  | No - other Ontario registries and databases used |
| Hutchinson et al., 2014 (26) | Mixed Methods | British Columbia | Health, well-being, and spirituality | To investigate health benefits of participating in cultural activities (harvesting), and demonstrate how applying mixed methods meets and informs these research standards and creates a unique, participatory Indigenous research method relevant for Métis People | Ages unspecified              | Details of the physical benefits of participating in the traditional activity of hunting, while also describing the wholistic health and well-being benefits related to harvesting amongst the Métis People.                                                                         | Yes | No                                               |
| Kaspar, 2014 (27)            | Quantitative  | Canada           | Mental health                        | To explore link between SI and MDE and Métis who were fostered vs. not fostered                                                                                                                                                                                     | Adults, ages unspecified      | More than one-third of emancipated respondents reported past year MDE, a prevalence rate nearly 50% higher than the rate of MDE among Métis respondents without a history of placement in foster care. The 25% lifetime prevalence rate of SI in the emancipated group was more than | No  | 2006 APS                                         |

|                                  |               |         |                               |                                                                                                                           |                          |                                                                                                                                                                                                                                                                                                                                                      |     |                                                    |
|----------------------------------|---------------|---------|-------------------------------|---------------------------------------------------------------------------------------------------------------------------|--------------------------|------------------------------------------------------------------------------------------------------------------------------------------------------------------------------------------------------------------------------------------------------------------------------------------------------------------------------------------------------|-----|----------------------------------------------------|
| King et al., 2022 (28)           | Mixed methods | Alberta | Pandemic-related intervention | To describe the unique approach in implementing Canada's first Métis-led COVID-19 immunization clinic                     | Ages unspecified         | twice the rate observed in the non-fostered group. 1300 people were vaccinated. Visitors shared appreciation for the culturally specific aspects of the clinic, which contributed to increased safety and comfort.                                                                                                                                   | Yes | No                                                 |
| Kumar et al., 2012 (29)          | Quantitative  | Canada  | Mental health                 | To determine the prevalence of SI among Métis and identify its associated risk and protective factors                     | Ages 20-59               | Prevalence of SI was higher among Métis men than in men who did not report Aboriginal identity. Métis women were more likely to report SI compared with Métis men (14.9% vs. 11.5%, respectively).                                                                                                                                                   | No  | 2006 APS                                           |
| Mazereeuw et al., 2018 (30)      | Quantitative  | Canada  | Physical diagnoses            | To estimate site-specific incidence rates and survival for the most common cancers among Métis                            | Ages 25-99               | Incidence was significantly higher among Métis adults than among non-Aboriginal adults for the following cancers: female breast, lung, liver, larynx, gallbladder, and cervix. Métis People had poorer survival for prostate cancer. But, for all cancers and both sexes combined, cancer incidence was similar for Métis and non-Aboriginal adults. | No  | 1991 Canadian Census Health and Environment Cohort |
| Monchalín et al., 2020 (11)      | Qualitative   | Ontario | Experience in health care     | To learn from Métis women's experiences to build an understanding on steps toward filling the health service gap          | Adults, ages unspecified | Métis women experience racial discrimination such as witnessing, absorbing, and facing racism in mainstream service settings, while experiencing lateral violence and discrimination in Indigenous-specific services.                                                                                                                                | Yes | No                                                 |
| Monchalín et al., 2019 (31)      | Qualitative   | Ontario | Experience in health care     | To gather recommendations made by urban Métis women for improving access to health and social services in Toronto, Canada | Ages 15+                 | Recommendations include (a) Métis presence, (b) holistic interior design, (c) Métis-specific or informed service space, (d) welcoming reception/front desk, and (e) culturally informed service providers                                                                                                                                            | Yes | No                                                 |
| Ramage-Morin & Bougie, 2017 (32) | Quantitative  | Canada  | Support networks              | To better understand family networks and self-perceived general and mental health among Métis                             | Ages 45+                 | Strong family networks are associated with positive self-perceived general and mental health among Métis adults.                                                                                                                                                                                                                                     | No  | 2012 APS                                           |
| Ryan et al., 2015 (33)           | Quantitative  | Canada  | Lifestyle risk factors        | To examine the correlates of current smoking among Métis with a particular focus on culturally-specific factors           | Ages 18+                 | 39.9% of adult Métis respondents in the sample were current smokers. Adult Métis who reported a high level of spirituality were less likely to be current smokers. Those who spoke an Indigenous language, or lived in a house where one was spoken, were more likely to be current smokers.                                                         | No  | 2006 APS                                           |
| Ryan et al., 2018 (34)           | Quantitative  | Canada  | Health, well-                 | To investigate the correlates of leisure-time physical activity (LTPA) and active                                         | Ages 20-64               | Having attended a Métis cultural event in the past year was positively                                                                                                                                                                                                                                                                               | No  | 2006 APS                                           |

1  
2  
3  
4  
5  
6  
7  
8  
9  
10  
11  
12  
13  
14  
15  
16  
17  
18  
19  
20  
21  
22  
23  
24  
25  
26  
27  
28  
29  
30  
31  
32  
33  
34  
35  
36  
37  
38  
39  
40  
41  
42  
43  
44  
45  
46  
47

being transportation (walking) associated with LTPA, as was a high level of spirituality. , and among adult Métis, with a particular focus on culturally specific variables

|                                                  |              |                  |                                            |                                                                                                                                                                        |                                         |                                                                                                                                                                                                                                                                              |     |                                                                                                                                               |
|--------------------------------------------------|--------------|------------------|--------------------------------------------|------------------------------------------------------------------------------------------------------------------------------------------------------------------------|-----------------------------------------|------------------------------------------------------------------------------------------------------------------------------------------------------------------------------------------------------------------------------------------------------------------------------|-----|-----------------------------------------------------------------------------------------------------------------------------------------------|
| Sanchez-Ramirez et al., 2016 (35)                | Quantitative | Alberta          | Physical diagnoses                         | To explore cancer incidence and mortality burden among Métis and to compare disease estimates with non-Métis population                                                | All ages based on Alberta registry used | A higher incidence of bronchus/lung cancer was found among Métis men. No other statistically significant differences in cancer incidence or mortality were found between Métis and non-Métis people.                                                                         | No  | No (2007 to 2012 obtained from Alberta Health Care Insurance Plan (AHCIP) – Central Stakeholder Registry – and Alberta Cancer Registry (ACR)) |
| Sanchez-Ramirez et al., 2019 (36)                | Quantitative | Alberta          | Access to urgent/emergency health services | To examine injury-related health services use, defined as hospital admissions and emergency department (ED) visits, as well as mortality among Métis People in Alberta | Adults, ages unspecified                | Injury related hospital admissions were 35% higher for Métis than non-Métis; injuries are a concern among Métis People.                                                                                                                                                      | No  | No                                                                                                                                            |
| Sanguins et al. (2013) (37) 1/1/0001 12:00:00 AM | Quantitative | Manitoba         | Mental health                              | To explore differences between Métis and other Manitobans with depression and/or anxiety disorders                                                                     | Ages 10+                                | Métis are more likely to develop depression and/or anxiety disorders compared to other Manitobans. Métis are 1.2 times more likely to have anxiety disorders and 1.3 times more likely to be diagnosed with substance misuse.                                                | Yes | No                                                                                                                                            |
| Wesche, 2013 (38)                                | Qualitative  | British Columbia | Health, well-being, and spirituality       | To examine links between Métis identity and health and well-being for Métis women at risk of sexual exploitation                                                       | Ages 25-54                              | Métis identity and well-being were strongly linked. Many Métis women reported negative experiences in accessing a range of both Aboriginal and mainstream services due to perceived prejudice. Métis-specific or Métis-inclusive services are desired but currently limited. | Yes | No                                                                                                                                            |

- Acronyms:
- ACSC- Ambulatory care sensitive conditions
  - ASHR- Age-standardized hospitalization rates
  - COPD- Chronic obstructive pulmonary disease
  - PMK- Person most knowledgeable about the child
  - APS- Aboriginal Peoples Survey
  - SI- Suicidal ideation
  - MDE- Major depressive episode



Table 2. N number and percentage of selected studies coded into each code. Codes were created based on an inductive and iterative process.

| Topic Code                                 | Number | Percentage |
|--------------------------------------------|--------|------------|
| Health, well-being, and spirituality       | 5      | 19%        |
| Mental health                              | 5      | 19%        |
| Physical diagnoses                         | 5      | 19%        |
| Pandemic-related interventions             | 3      | 12%        |
| Access to urgent/emergency health services | 2      | 8%         |
| Support networks                           | 2      | 8%         |
| Experience in health care                  | 2      | 8%         |
| Lifestyle risk factors                     | 2      | 8%         |
